# Supplementary material for: Hierarchically porous SiO2/C hollow microspheres: a highly efficient adsorbent for Congo Red removal
Source: PubMed Central journal article supplement — RSC Adv. 2018 May 30;8(35):19852–60. doi: 10.1039/c8ra02988a (PMC9080780; doi:10.1039/c8ra02988a), 2018-05-30

**Supporting Information**

**Hierarchically porous SiO<sub>2</sub>/C hollow microspheres: a highly efficient adsorbent for Congo Red removal**

*Jie Wang<sup>1</sup>, Longya Xiao<sup>1</sup>, Shuai Wen<sup>1</sup>, Nuo Chen<sup>1</sup>, Zhiyin Dai<sup>1</sup>, Junyang Deng<sup>1</sup>,*

*Longhui Nie<sup>\*1,2</sup>, Jie Min<sup>\*1</sup>*

*<sup>1</sup>Hubei Provincial Key Laboratory of Green Materials for Light Industry, Hubei University of Technology, Wuhan 430068, P. R. China;*

*<sup>2</sup>Collaborative Innovation Center of Green Light-weight Materials and Processing, Hubei University of Technology, Wuhan 430068, P. R. China;*

\*Corresponding author: Tel. +86 59750482, E-mails: [nielonghui@mail.hbut.edu.cn](mailto:nielonghui@mail.hbut.edu.cn)

(L. Nie); [whutminj@163.com](mailto:whutminj@163.com) (J. Min)

**Table S1** Element composition and content of PHSCHMs.

| Elements | Atomic % |
|----------|----------|
| C        | 88.28    |
| O        | 11.26    |
| Si       | 0.2      |
| Na       | 0.26     |

**Table S2** Pseudo-first-order model, pseudo-second-order model constants and correlation coefficients for adsorption of CR over PHSCHMs at 30 °C.

| Initial CR concentration ( mg/L ) | Pseudo-first-order kinetic model |        | Pseudo-second-order kinetic model |        |
|-----------------------------------|----------------------------------|--------|-----------------------------------|--------|
|                                   | $k_1(\text{min}^{-1})$           | $R^2$  | $k_2(\text{min}^{-1})$            | $R^2$  |
| 20                                | 0.0068                           | 0.9054 | 0.0050                            | 1      |
| 40                                | 0.0056                           | 0.8001 | 0.0025                            | 0.9999 |
| 60                                | 0.0054                           | 0.8477 | 0.0017                            | 0.9999 |
| 80                                | 0.0058                           | 0.8716 | 0.0013                            | 0.9999 |
| 100                               | 0.0055                           | 0.9503 | 0.0010                            | 0.9999 |

**Table S3** Intraparticle diffusion model constants and correlation coefficients for adsorption of CR over PHSCHMs at 30 °C.

| Initial CR concentration (mg/L) | Intraparticle diffusion model       |                                     |                                     |       |       |       |           |           |           |  |
|---------------------------------|-------------------------------------|-------------------------------------|-------------------------------------|-------|-------|-------|-----------|-----------|-----------|--|
|                                 | $k_{d1}$ (mg/g min <sup>1/2</sup> ) | $k_{d2}$ (mg/g min <sup>1/2</sup> ) | $k_{d3}$ (mg/g min <sup>1/2</sup> ) | $C_1$ | $C_2$ | $C_3$ | $(R_1)^2$ | $(R_2)^2$ | $(R_3)^2$ |  |
| 20                              | 87.7                                | 6.1                                 | 0.28                                | 0     | 101.8 | 190.2 | 1         | 0.871     | 0.760     |  |
| 40                              | 167.6                               | 26.0                                | 1.31                                | 0     | 177.2 | 363.5 | 1         | 0.943     | 0.782     |  |
| 60                              | 241.8                               | 29.4                                | 1.79                                | 0     | 260.7 | 544.3 | 1         | 0.943     | 0.881     |  |
| 80                              | 318.2                               | 26.7                                | 1.09                                | 0     | 373.5 | 757.4 | 1         | 0.868     | 0.818     |  |
| 100                             | 395.4                               | 33.2                                | 3.27                                | 0     | 402.2 | 891.7 | 1         | 0.975     | 0.915     |  |

**Table S4** Adsorption isotherm parameters of the PHSCHMs sample.

| Langmuir model                      |                                    |        |        | Freundlich model |                                                                       |        |
|-------------------------------------|------------------------------------|--------|--------|------------------|-----------------------------------------------------------------------|--------|
| $q_m/(\text{mg}\cdot\text{g}^{-1})$ | $K_L/(\text{L}\cdot\text{g}^{-1})$ | $R_L$  | $R^2$  | $1/n$            | $K_F/(\text{mg}\cdot\text{g}^{-1})(\text{L}\cdot\text{g}^{-1})^{1/n}$ | $R^2$  |
| 2512                                | 0.79                               | 0.0063 | 0.9834 | 0.51             | 968                                                                   | 0.9905 |

**Figure S1** FT-IR spectra of hollow  $\text{SiO}_2/\text{carbon}$  composite microspheres before (a) and after (b) NaOH etching, and the PHSCHMs sample after adsorption of CR.

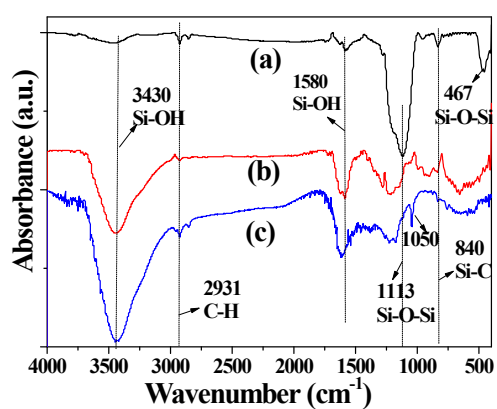

**Figure S2** Zeta potential vs. pH values of the HPSCHMs sample.

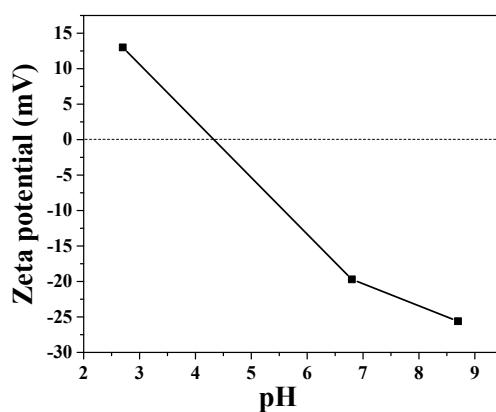

Supplement: RA-008-C8RA02988A-s001.pdf [file RA-008-C8RA02988A-s001.pdf]
